# Supplementary material for: AMPKα2 regulates fasting-induced hyperketonemia by suppressing SCOT ubiquitination and degradation
Source: PubMed Central journal article supplement (PMC10798978; doi:10.1038/s41598-023-49991-5), 2024-01-19

Figure 3A

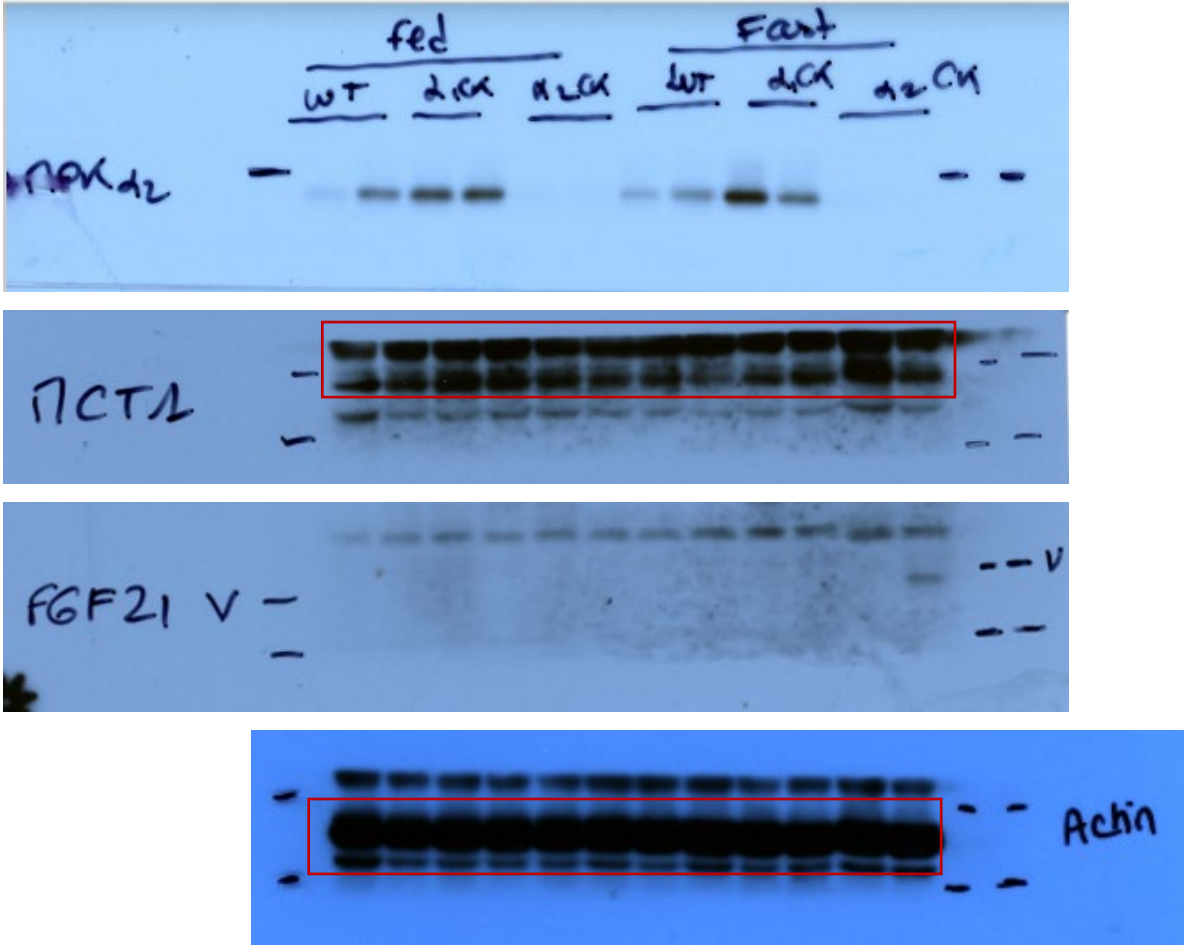

Figure 3B

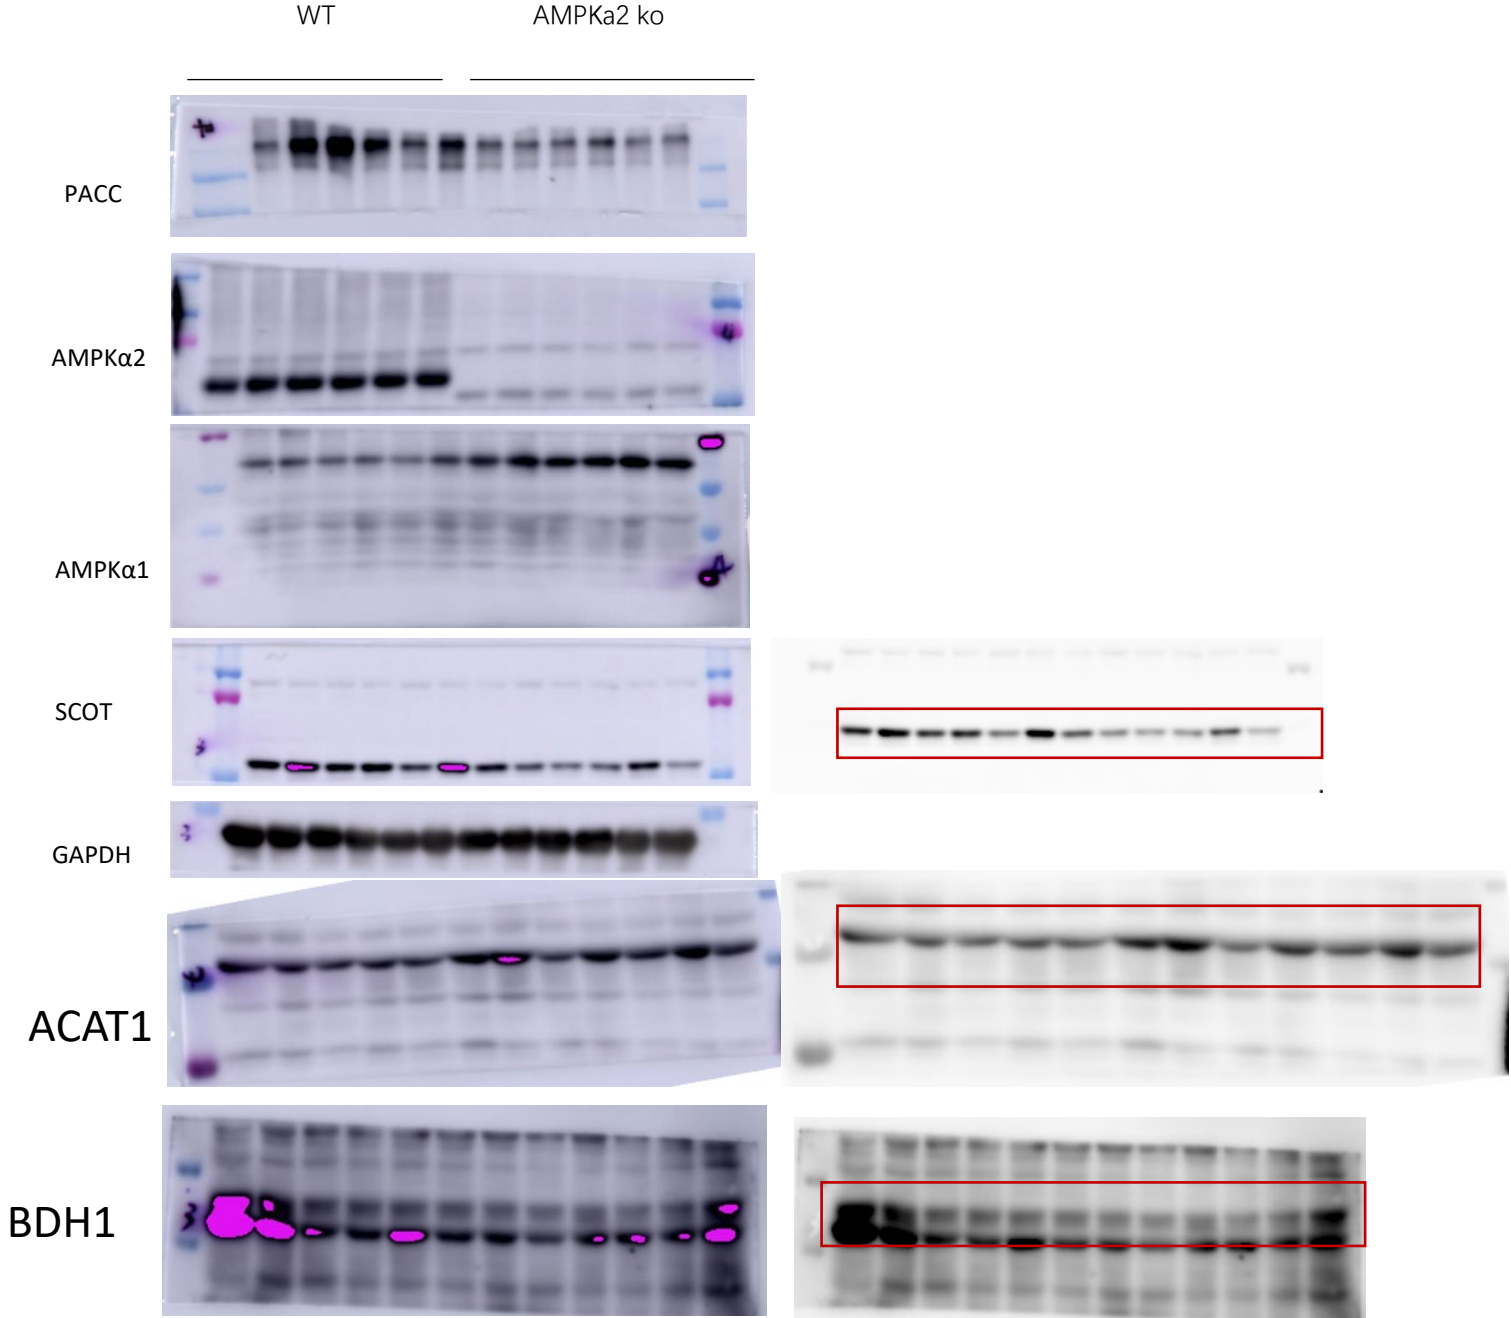

Figure 3C

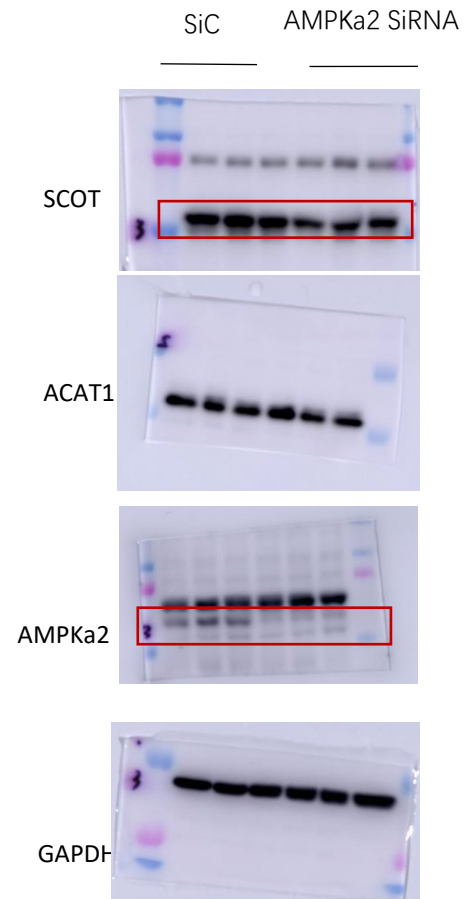

Figure 3D compound c

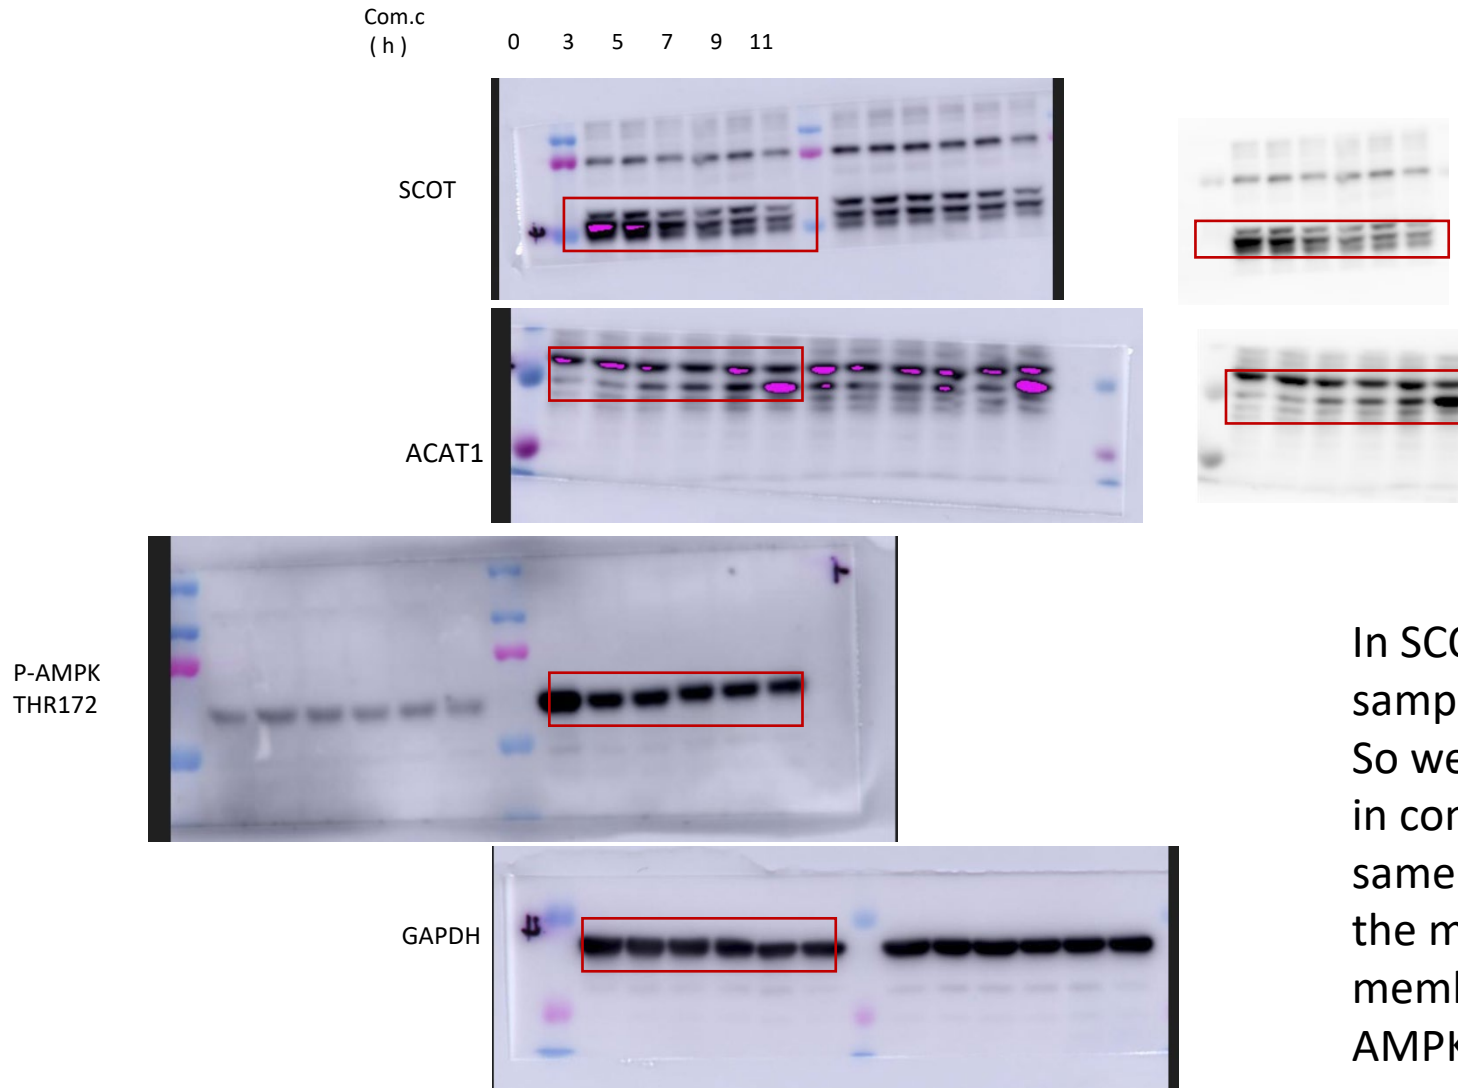

In SCOT, ACAT1 and GAPDH, I use the sample of compound c and A769662. So we can find this membrane is used in compound c and A769662 at the same time. But for ACAT1, I forgot add the marker in the middle. So the membrane is different. For the p-AMPK THR172, because I do it in the second day, the sequence is different with others.

Figure 3D A769662

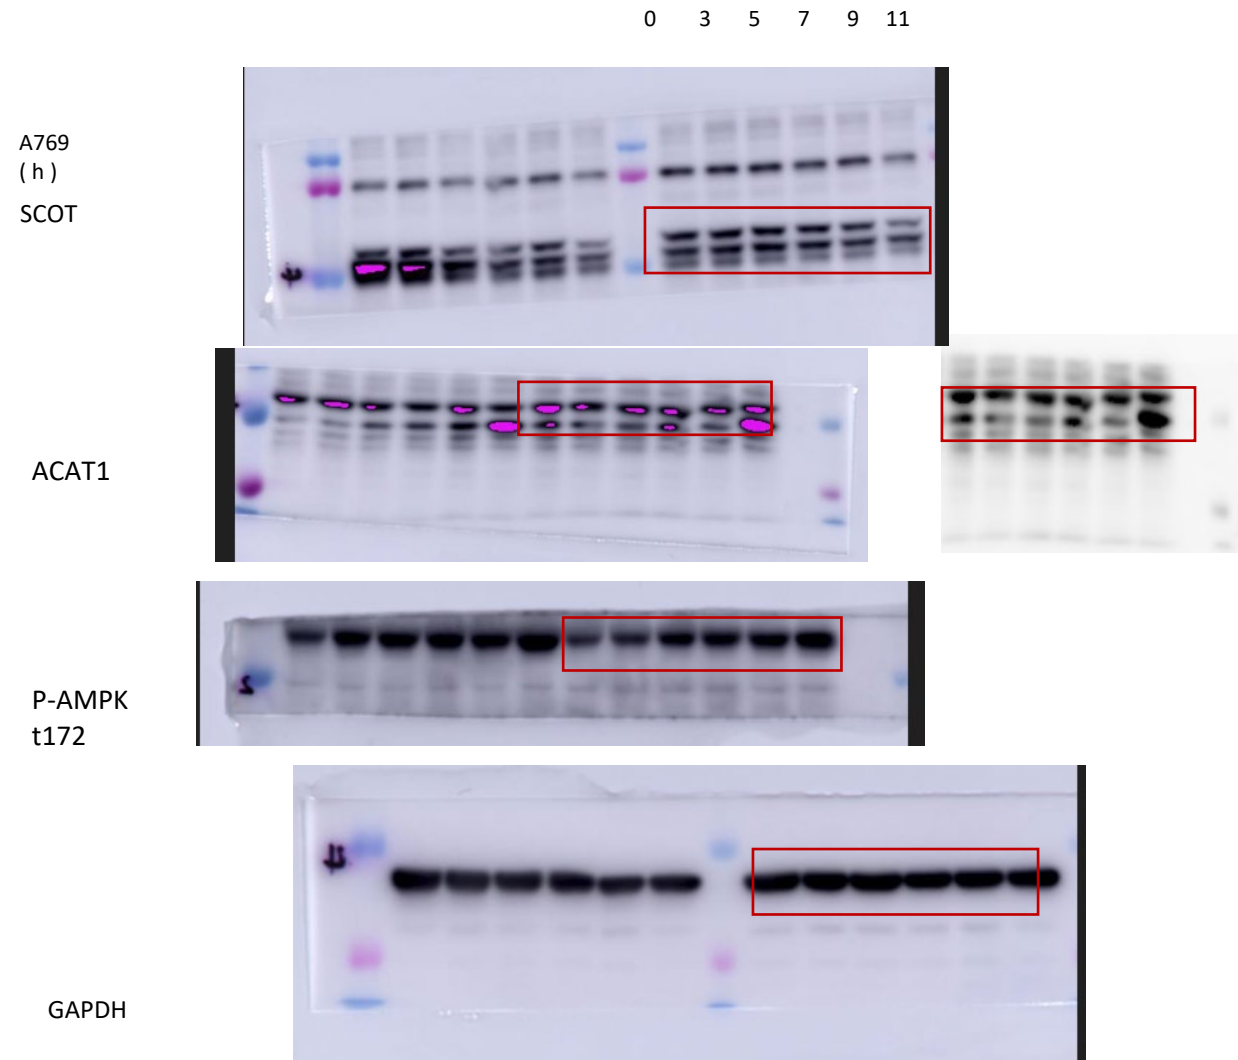

Figure 4D

CHX                      CHX+COM.C  
0h 3h 6h 9h 12h    0h 3h 6h 9h 12h

SCOT

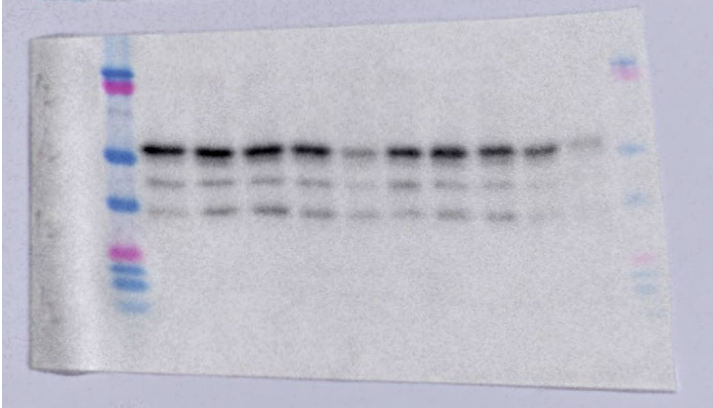

GAPDH

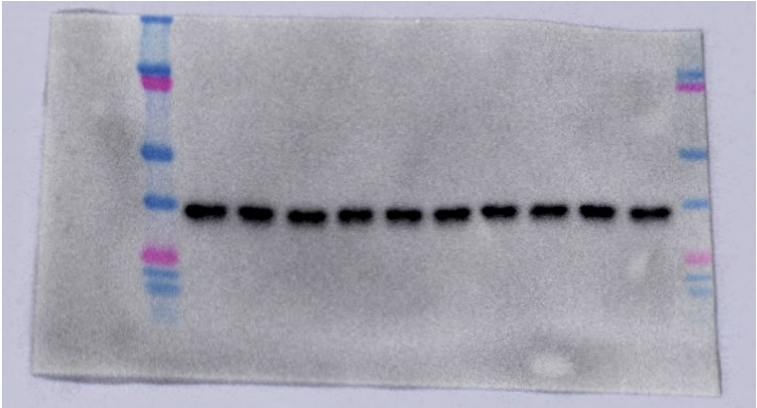

Figure 4E

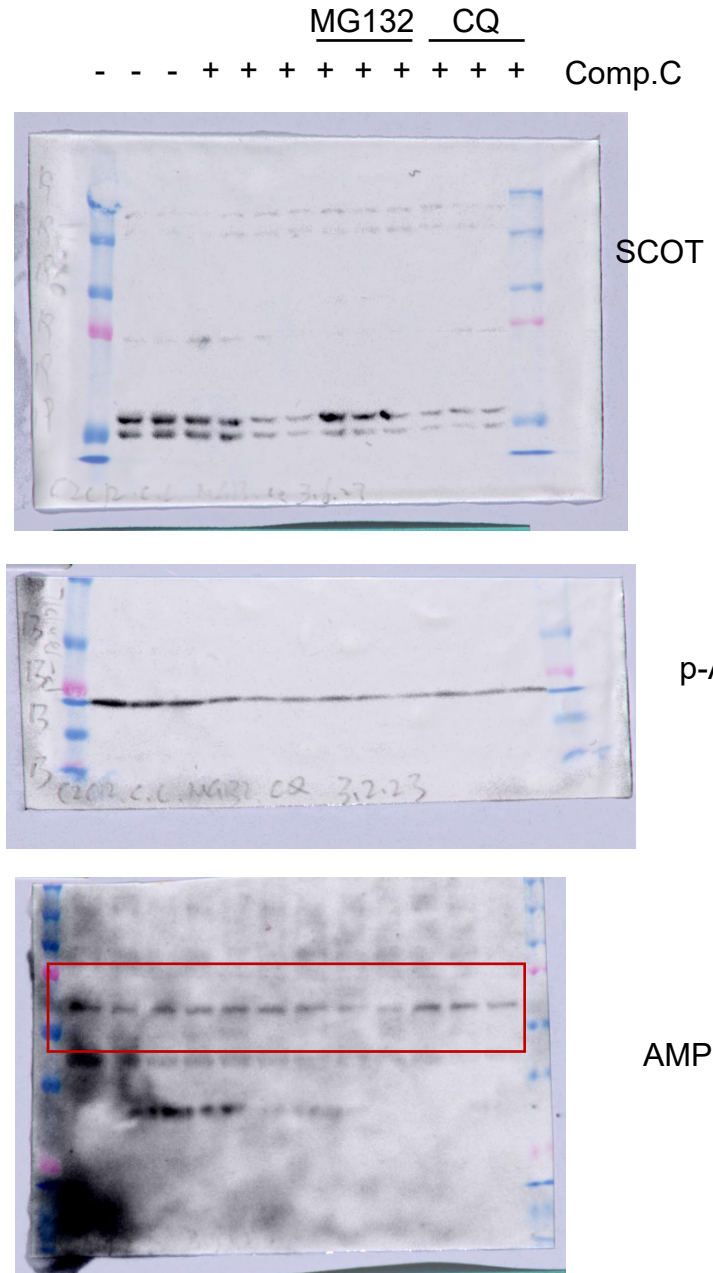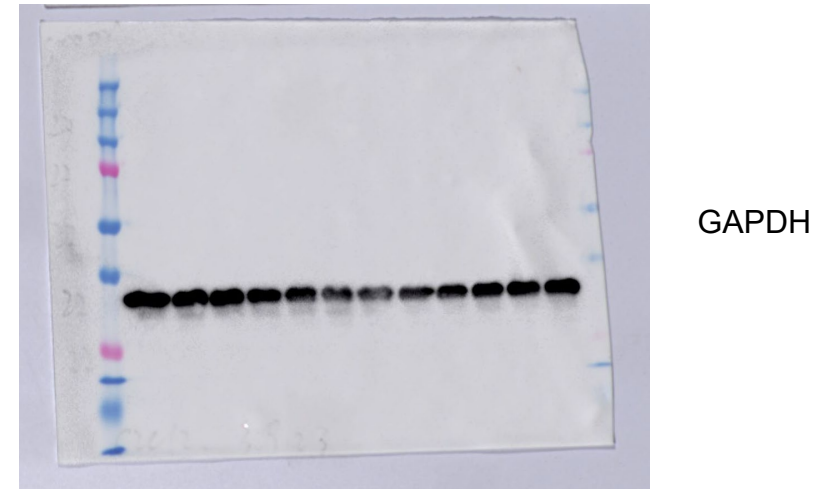

Figure 4F

|          | INPUT |   |   |   | IP:GST |   |   |   |
|----------|-------|---|---|---|--------|---|---|---|
| GST-SCOT | -     | - | + | + | -      | - | + | + |
| GST      | +     | + | - | - | +      | + | - | - |
| COM.C    | -     | + | - | + | -      | + | - | + |

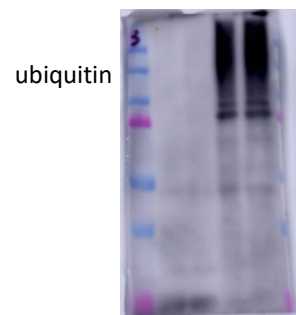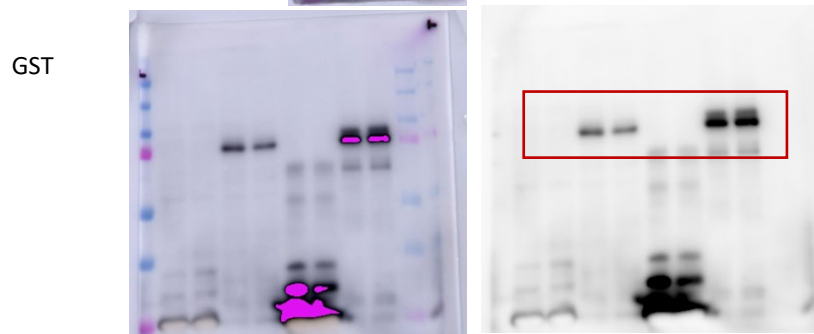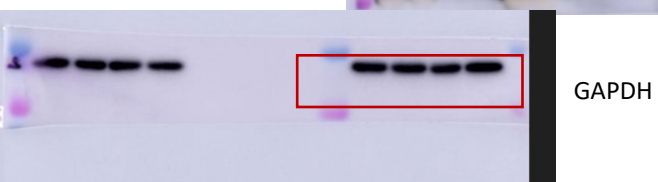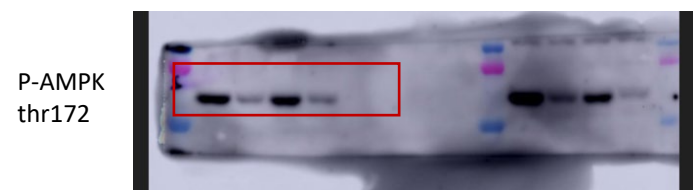



Figure 5A

| lysate |   | IP:myc-trap |   |                 |
|--------|---|-------------|---|-----------------|
| -      | + | -           | + | Myc- $\alpha$ 2 |
| +      | - | +           | - | myc             |

Scot

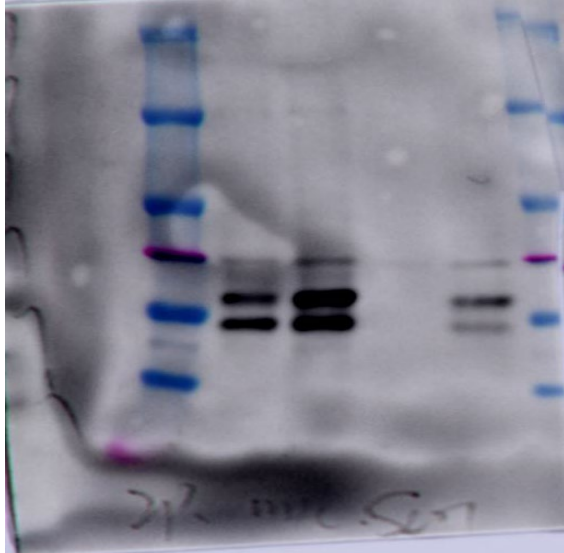

myc

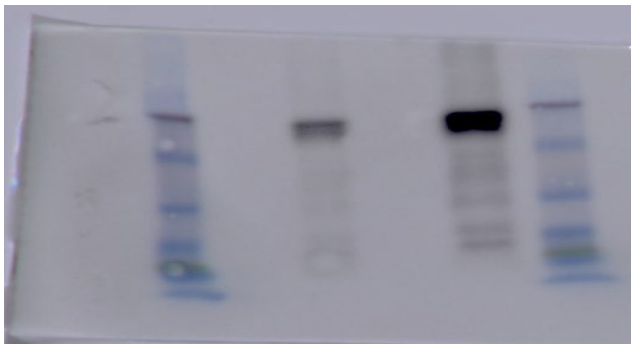

Figure 5B

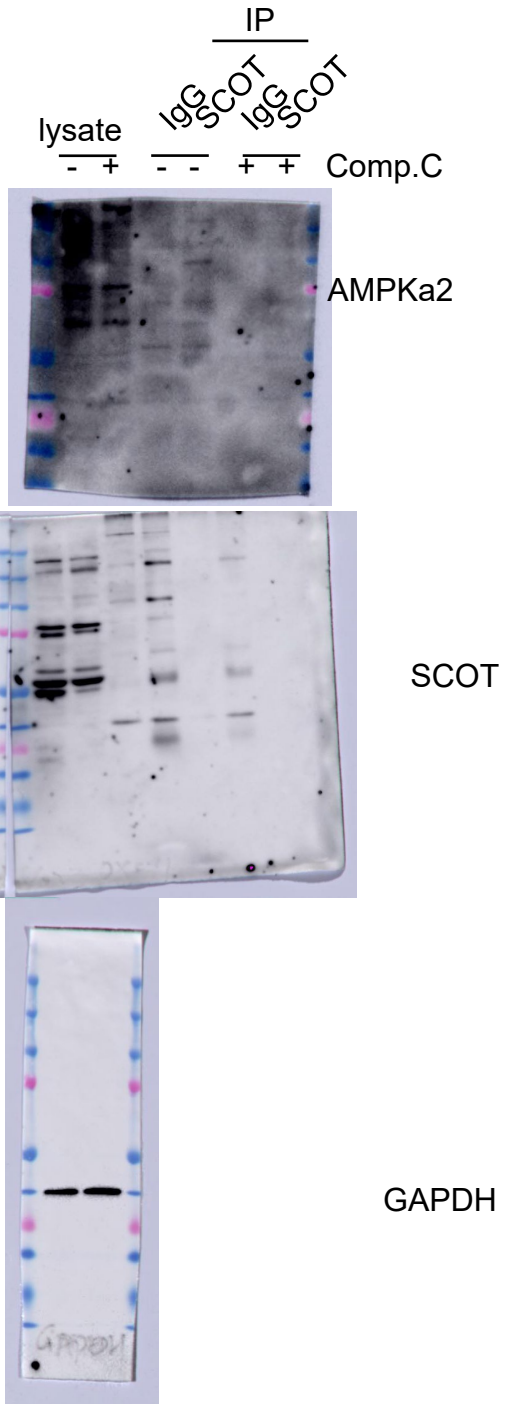

Figure 5C

| lysate |   |   |   | IP:myc-trap |   |   |   |                 |
|--------|---|---|---|-------------|---|---|---|-----------------|
| -      | + | - | + | -           | + | - | + | Myc- $\alpha$ 2 |
| +      | - | + | - | +           | - | + | - | myc             |
| -      | - | + | + | -           | - | + | + | Com.C           |

Scot

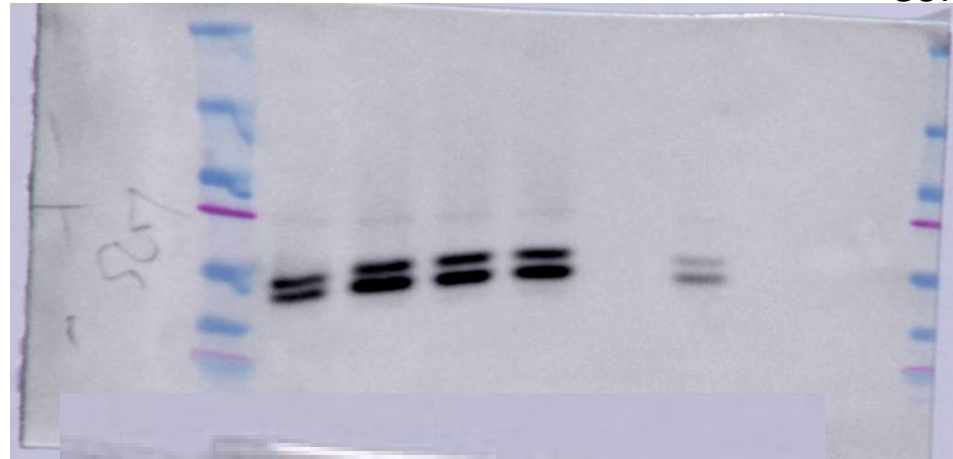

p-AMPK

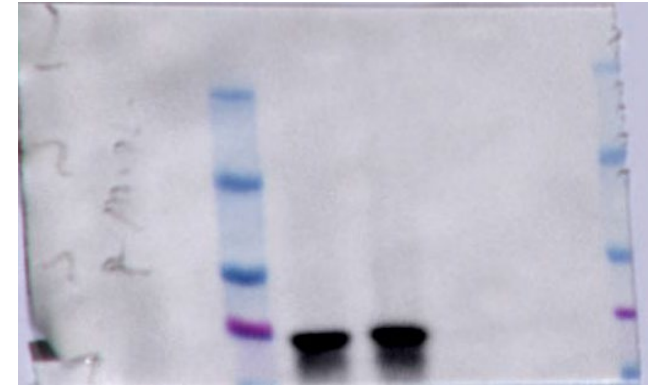

myc

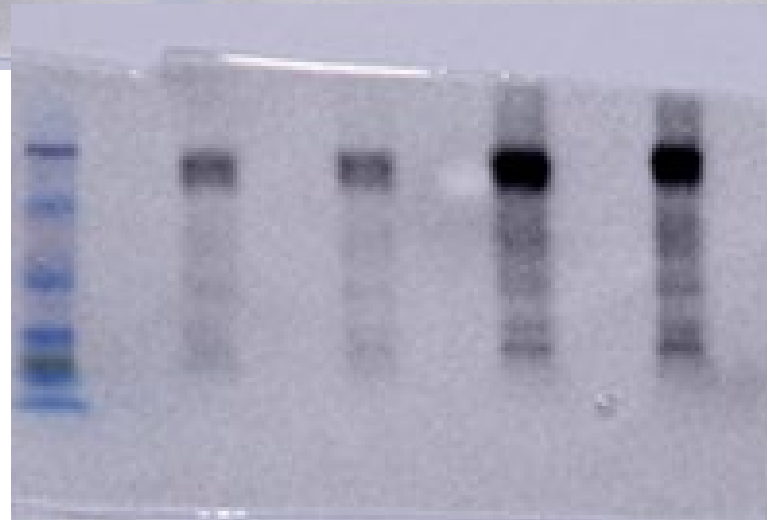

GAPDH

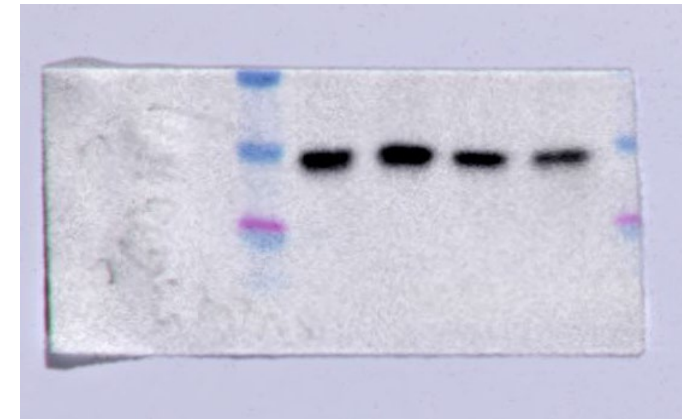

Figure 5D

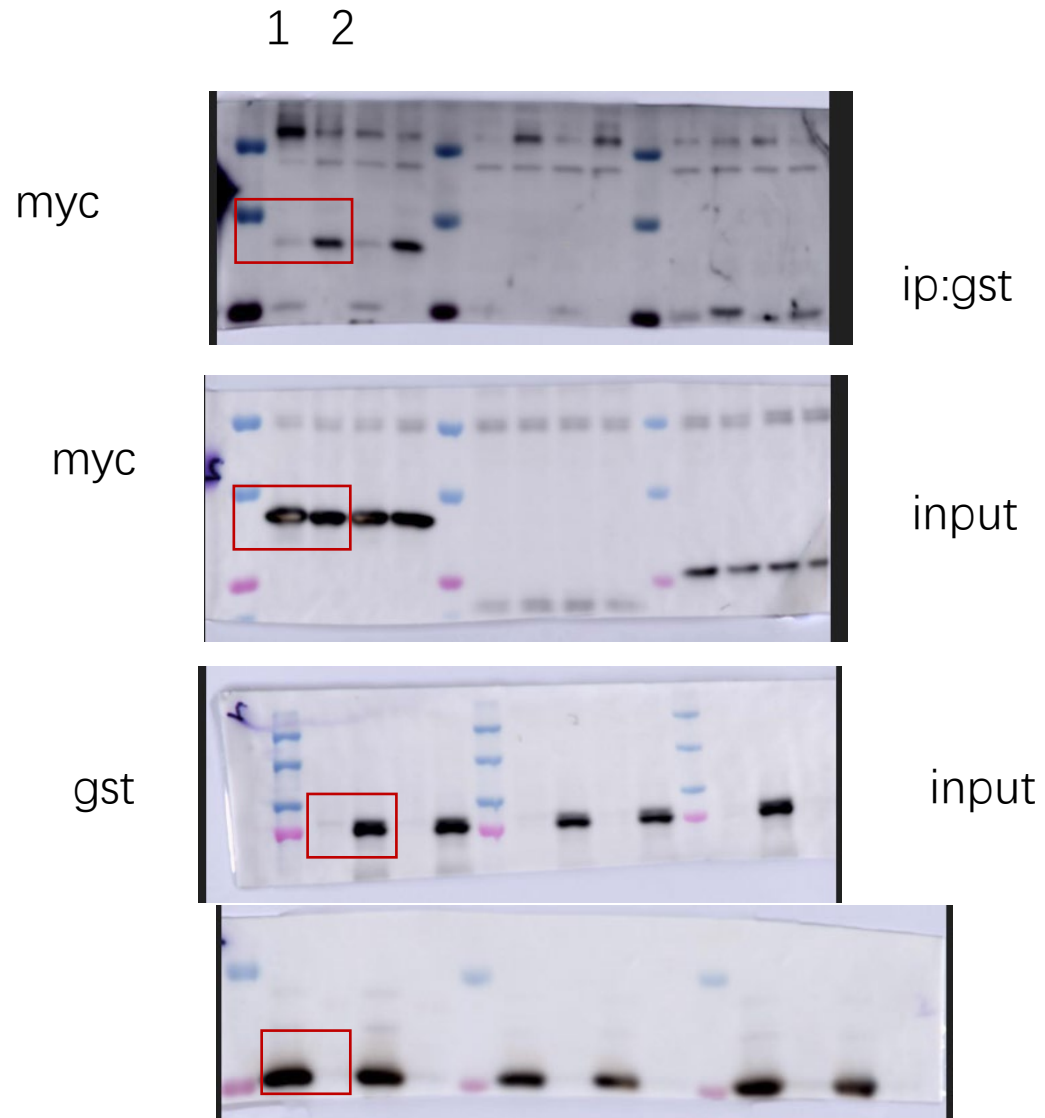

1: GST+ MYC-AMPK $\alpha$ 2  
domain 1  
2: GST-SCOT+ MYC-  
AMPK $\alpha$ 2 domain 1

Figure 5D

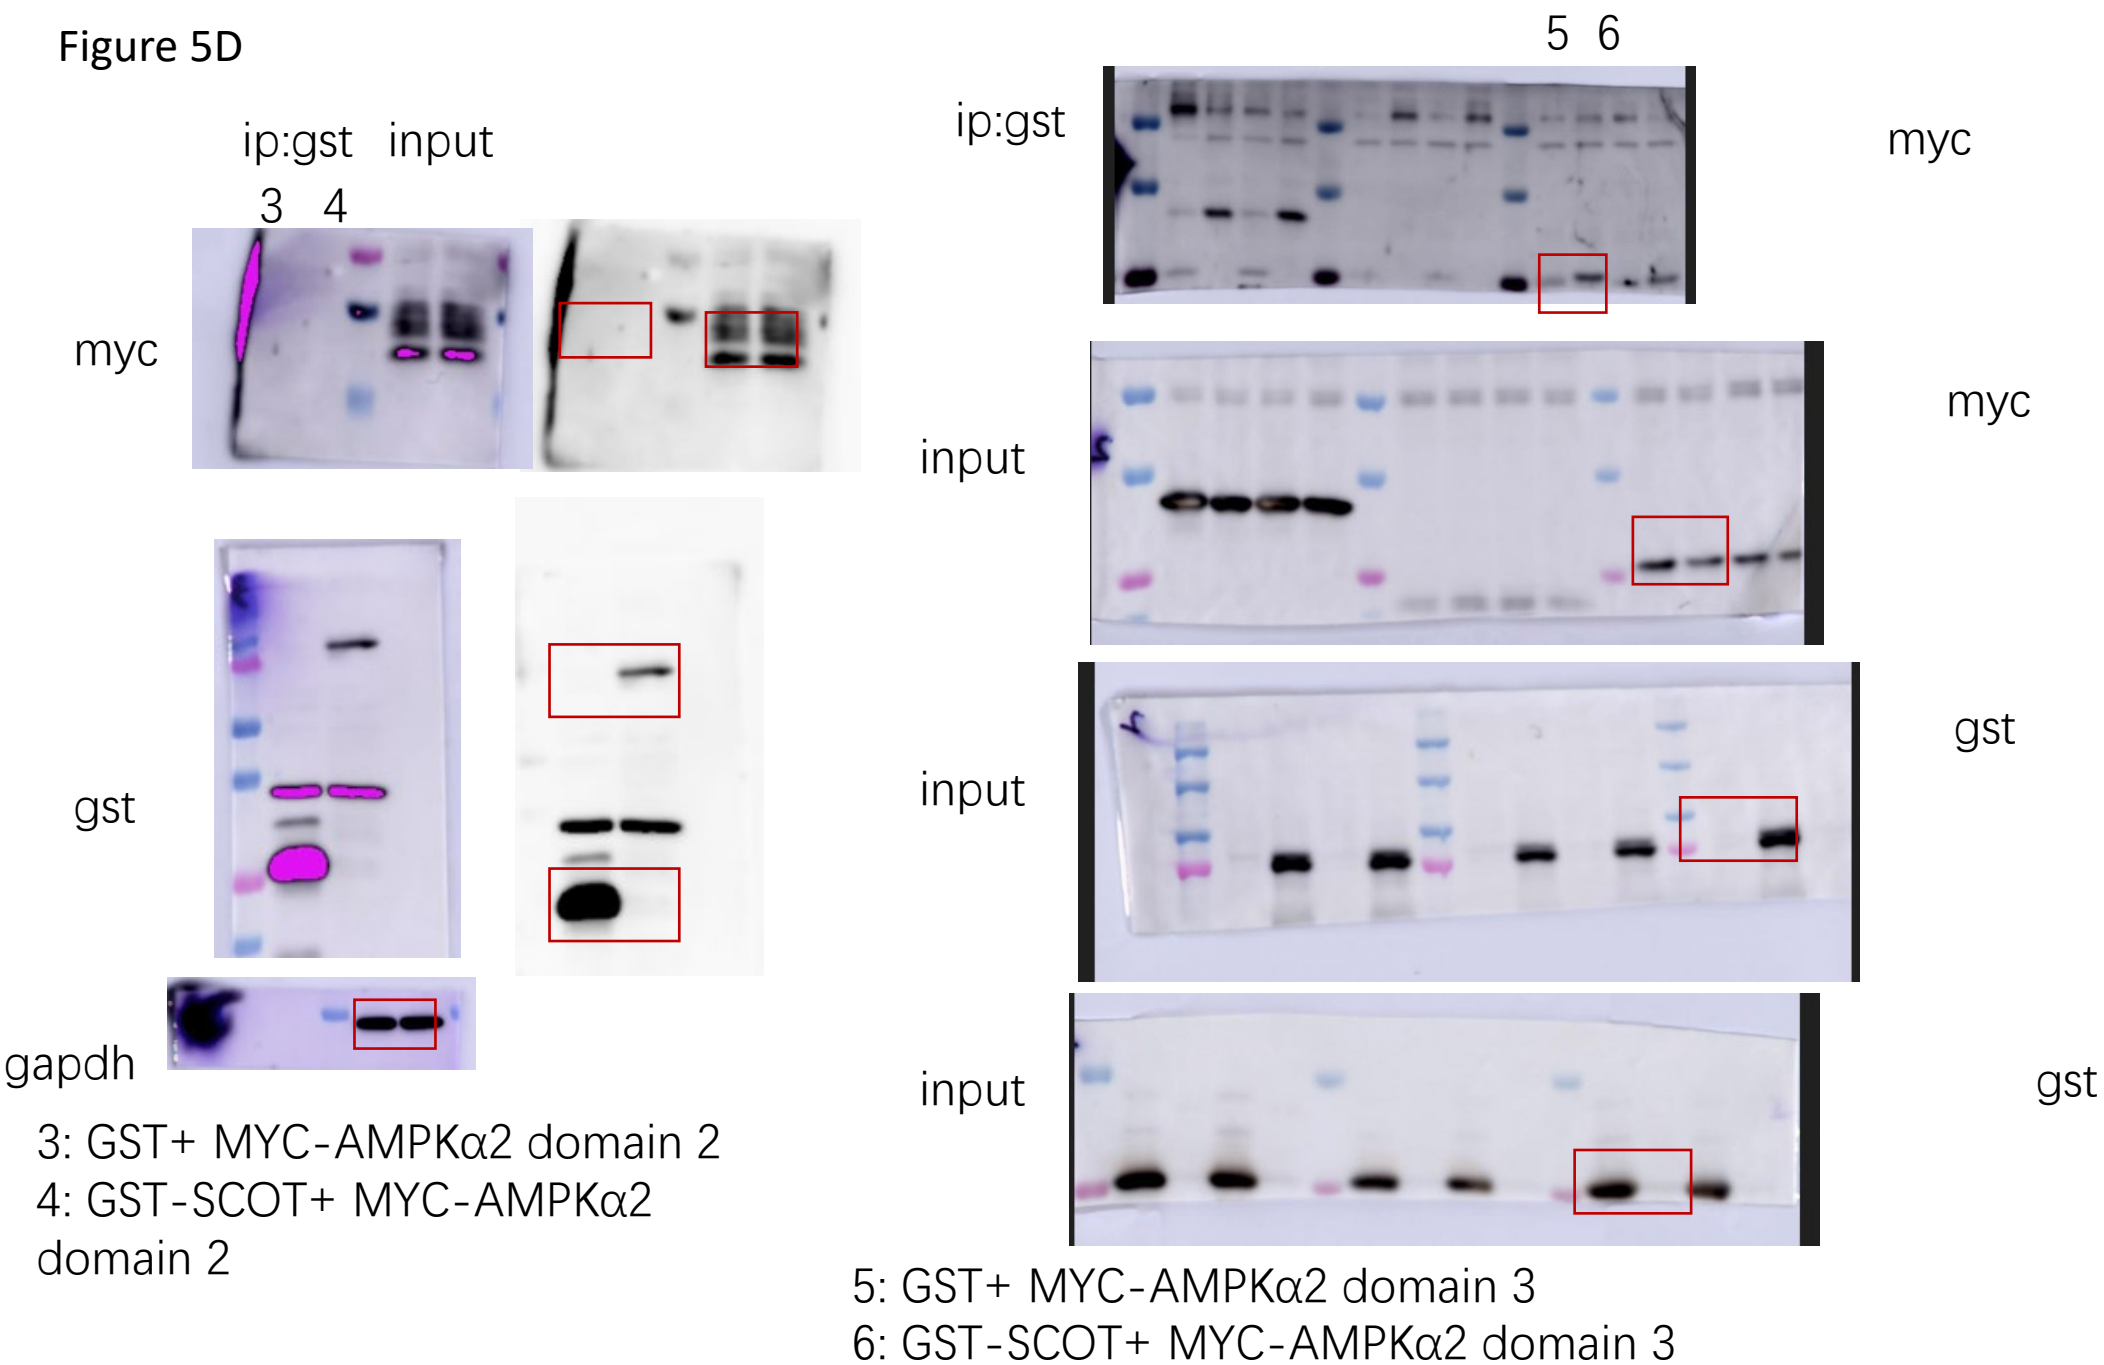

Figure 5E

GST-SCOT + MYC- AMPK domain1

com.c

- +

myc

gst

ip:gst

myc

gst

actin

input

input

input

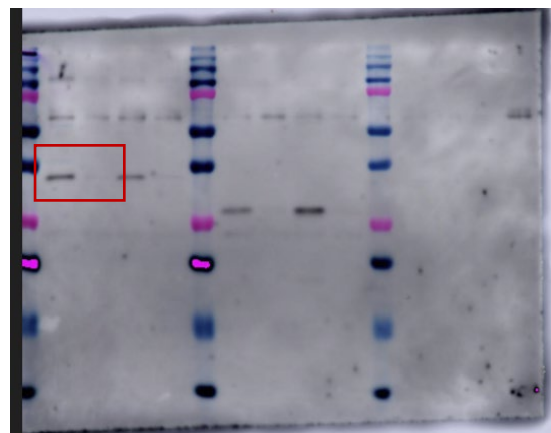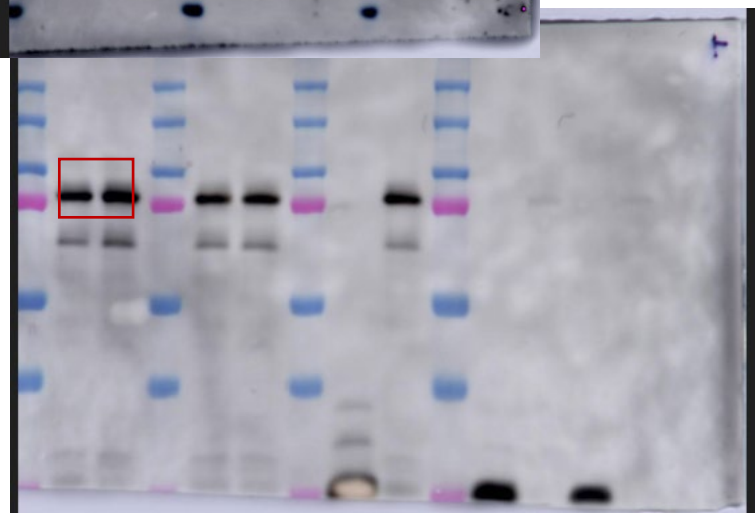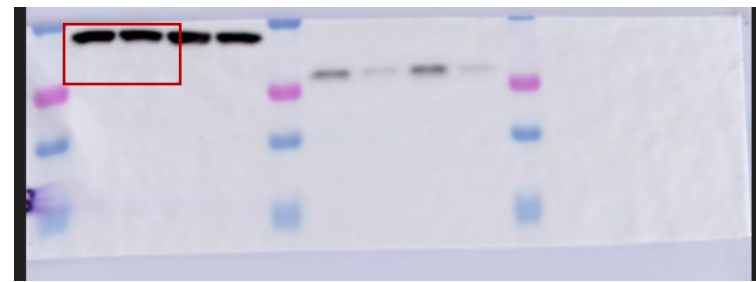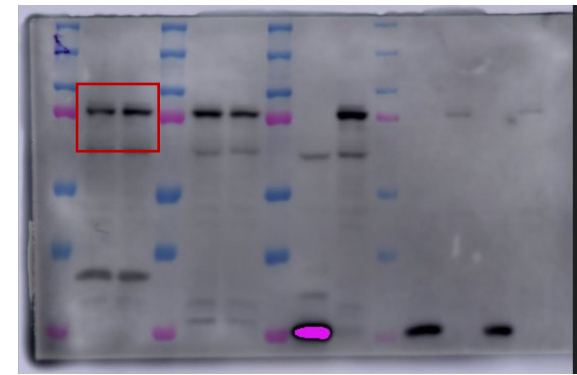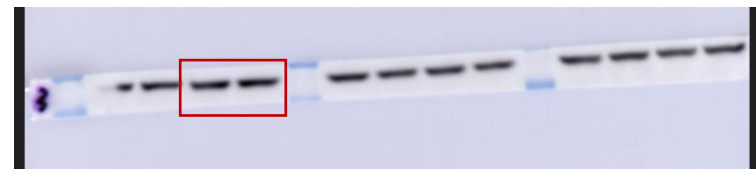

Figure 5F

1: GST-SCOT + AMPK $\alpha$ 2 WT  
2: GST-SCOT + AMPK $\alpha$ 2 K45R

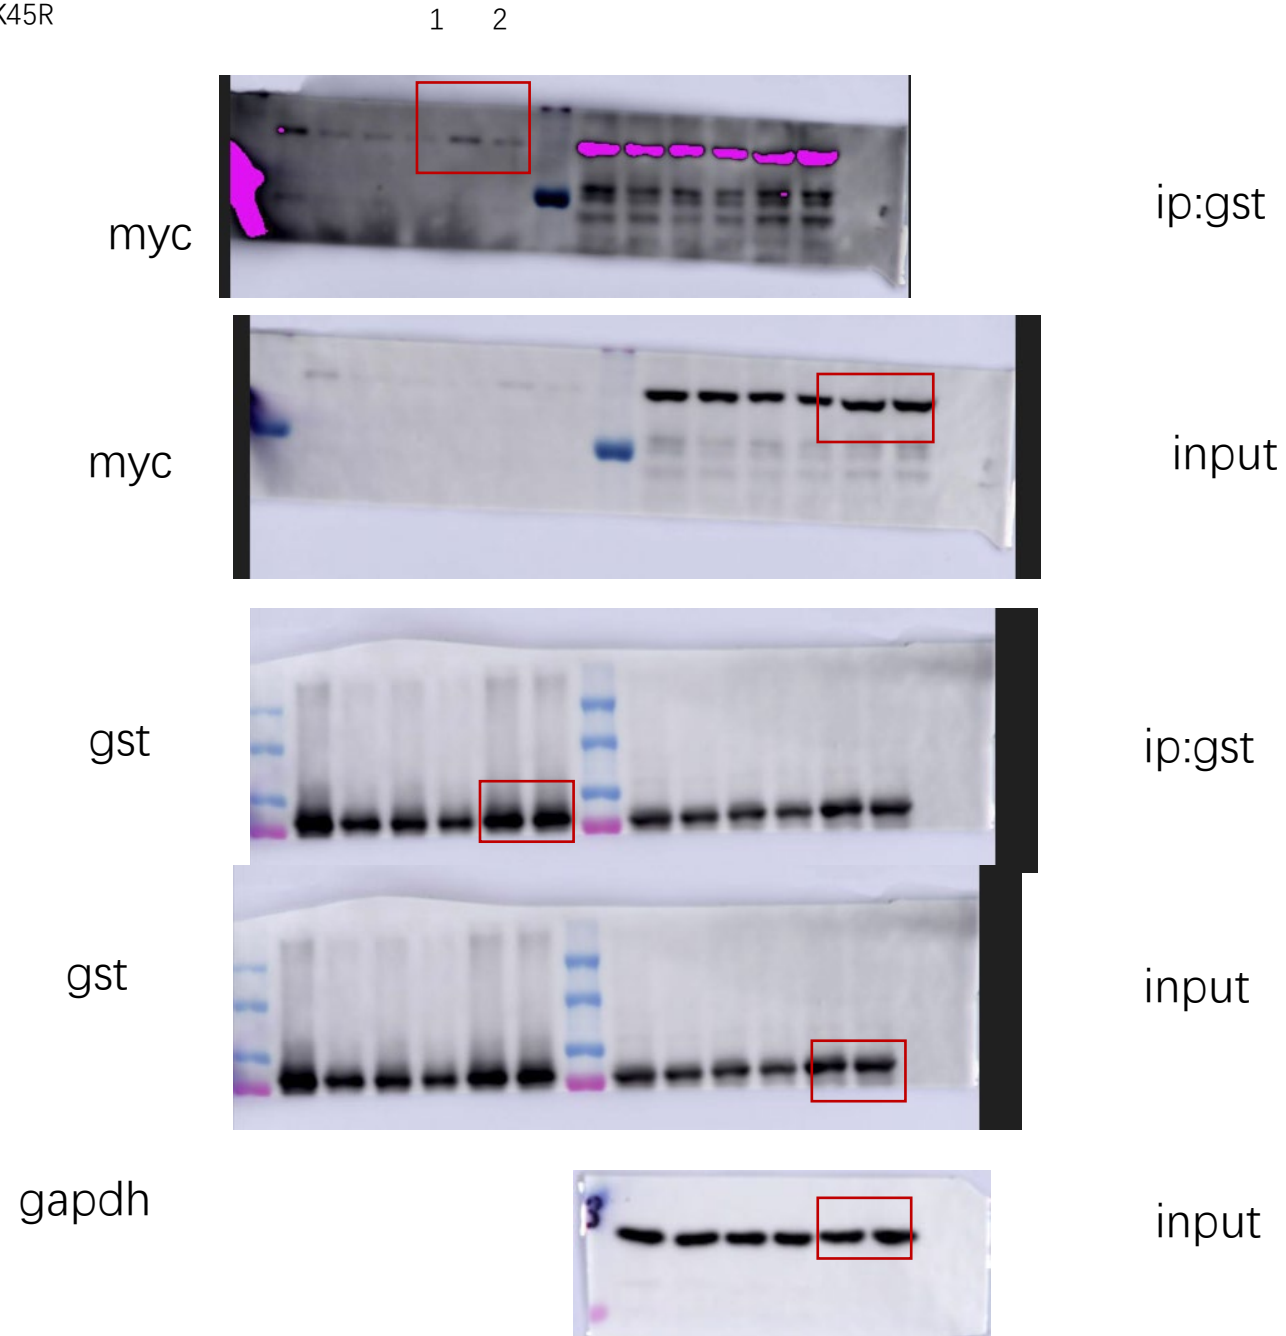

Figure 5G 1 2

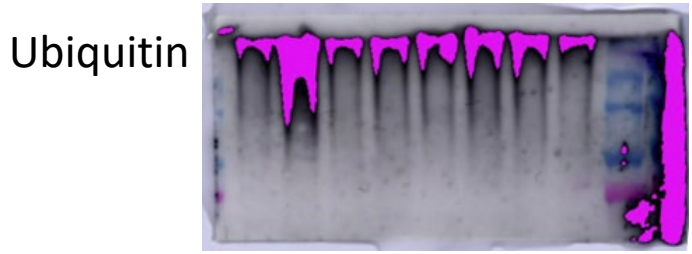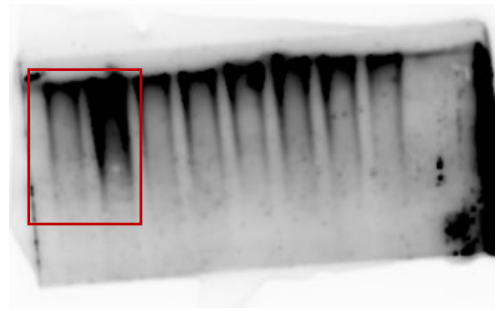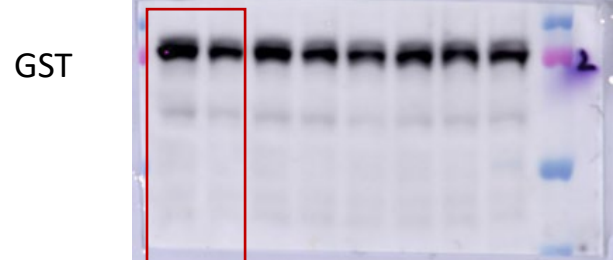

1: GST-SCOT+ MYC-WT+UB  
2: GST-SCOT+ MYC-K45R+UB

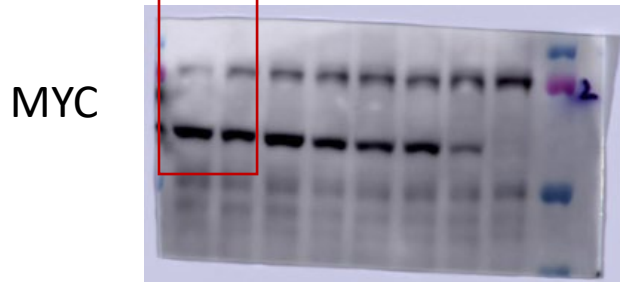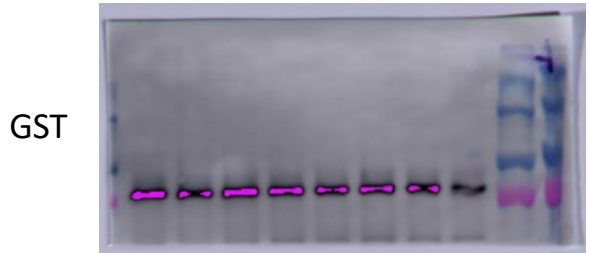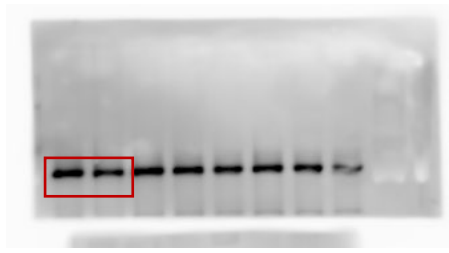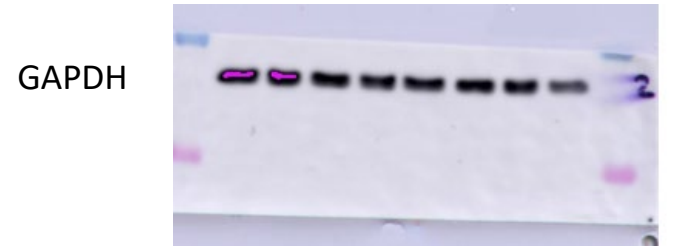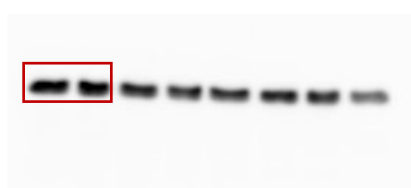

Supplement: 41598_2023_49991_MOESM2_ESM.pdf [file 41598_2023_49991_MOESM2_ESM.pdf]
