# Supplementary material for: AMPKα2 regulates fasting-induced hyperketonemia by suppressing SCOT ubiquitination and degradation
Source: PubMed Central journal article supplement (PMC10798978; doi:10.1038/s41598-023-49991-5), 2024-01-19
Supplement: 41598_2023_49991_MOESM1_ESM.pdf [file 41598_2023_49991_MOESM1_ESM.pdf]

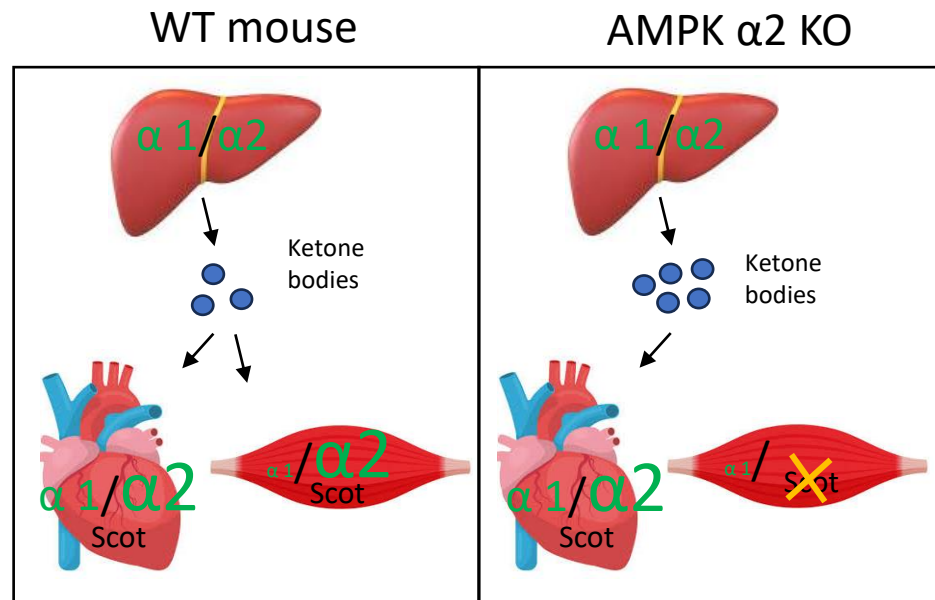

**AMPK $\alpha 2$  binds and regulates SCOT activity in mouse tissue.**

Ketone accumulated in skeletal muscle specific AMPK $\alpha 2$  KO mice because AMPK $\alpha 2$  KO decreases Scot activity
